# Supplementary material for: Dihedral-Angle Dependence of Intermolecular Transfer Integrals in BEDT-BDT-Based Radical-Cation Salts with θ-Type Molecular Arrangements
Source: MDPI journal article supplement (doi:10.3390/cryst11080868), 2021-07-27
Supplement: s1 [file s1]

Supplementary Information

**Dihedral-Angle Dependence of Intermolecular Transfer Integrals in BEDT-BDT-based Radical-Cation Salts with  $\theta$ -type Molecular Arrangements**

Tomofumi Kadoya<sup>1,\*</sup>, Shiori Sugiura<sup>2</sup>, Toshiki Higashino<sup>3</sup>, Keishiro Tahara<sup>1</sup>, Kazuya Kubo<sup>1</sup>, Takahiko Sasaki<sup>2</sup>, Kazuo Takimiya<sup>4,5</sup>, Jun-ichi Yamada<sup>1</sup>

1. Graduate School of Science, Department of Material Science, University of Hyogo, 3-2-1 Kouto, Kamigori-cho, Ako-gun, Hyogo 678-1297, Japan.
2. Institute for Materials Research, Tohoku University, 2-1-1 Katahira, Aoba-ku, Sendai, Miyagi, 980-8577, Japan
3. National Institute of Advanced Industrial Science and Technology, Tsukuba, Ibaraki 305-8565, Japan.
4. RIKEN CEMS, 2-1 Hirosawa, Wako, Saitama 351-0198, Japan.
5. Graduate School of Science, Tohoku University, 6-3, Aramaki Aza-Aoba, Aoba-ku, Sendai, Miyagi, 980-8578, Japan

Correspondence: kadoya.t@sci.u-hyogo.ac.jp; Tel.: +81-(791)-58-0164

## DFT calculation

To estimate the respective distribution maps of HOMO shown in Chart 1, density functional theory (DFT) calculations were performed with Gaussian09 program<sup>S1</sup> using the Becke, three-parameter, Lee–Yang–Parr (B3LYP) hybrid exchange-correlation functional<sup>S2</sup> and the 6-31G\* basis set<sup>S3</sup> for a full geometry optimization. Molecular orbital composition analysis was conducted using the GaussSum Program.

## Crystallographic data

**Table S1** Crystallographic data of  $\theta$ -(BEDT-BDT)AsF<sub>6</sub> and  $\theta$ -(BEDT-BDT)PF<sub>6</sub>.

|                                                       |                                                                 |               |                                                                |
|-------------------------------------------------------|-----------------------------------------------------------------|---------------|----------------------------------------------------------------|
| Chemical formula                                      | C <sub>14</sub> H <sub>10</sub> S <sub>6</sub> AsF <sub>6</sub> |               | C <sub>14</sub> H <sub>10</sub> S <sub>6</sub> PF <sub>6</sub> |
| Formula weight                                        | 559.51                                                          |               | 515.56                                                         |
| Crystal shape                                         | brown plate                                                     |               | red-brown plate                                                |
| Crystal size (mm <sup>3</sup> )                       | 0.231×0.114×0.008                                               |               | 0.134×0.061×0.018                                              |
| Crystal system                                        | monoclinic                                                      | monoclinic    | monoclinic                                                     |
| Space group                                           | <i>C2/c</i>                                                     | <i>C2/c</i>   | <i>C2/c</i>                                                    |
| <i>a</i> (Å)                                          | 37.322(8)                                                       | 37.42(6)      | 37.07(2)                                                       |
| <i>b</i> (Å)                                          | 4.3105(8)                                                       | 4.191(7)      | 4.278(2)                                                       |
| <i>c</i> (Å)                                          | 11.680(3)                                                       | 11.85(2)      | 11.556(8)                                                      |
| $\alpha$ (°)                                          | 90                                                              | 90            | 90                                                             |
| $\beta$ (°)                                           | 106.927(3)                                                      | 107.99(3)     | 106.681(11)                                                    |
| $\gamma$ (°)                                          | 90                                                              | 90            | 90                                                             |
| <i>V</i> (Å <sup>3</sup> )                            | 1797.7(6)                                                       | 1768(5)       | 1755.3(19)                                                     |
| <i>Z</i>                                              | 4                                                               | 4             | 4                                                              |
| Unique reflections ( <i>R</i> <sub>int</sub> )        | 2036 (0.0268)                                                   | 1513 (0.0565) | 1994 (0.0462)                                                  |
| <i>D</i> <sub>calc</sub> (g/cm <sup>3</sup> )         | 2.067                                                           | 2.101         | 1.951                                                          |
| <i>R</i> <sub>1</sub> ( <i>I</i> > 2.00σ( <i>I</i> )) | 0.1046                                                          | 0.1353        | 0.1284                                                         |
| w <i>R</i> <sub>2</sub> (All reflections)             | 0.3491                                                          | 0.4408        | 0.3902                                                         |
| GOF                                                   | 1.639                                                           | 1.612         | 1.761                                                          |
| Temperature (K)                                       | 270                                                             | 93            | 93                                                             |
| CCDC number                                           | 2092710                                                         | 2092712       | 2092714                                                        |

## Bond-length analysis

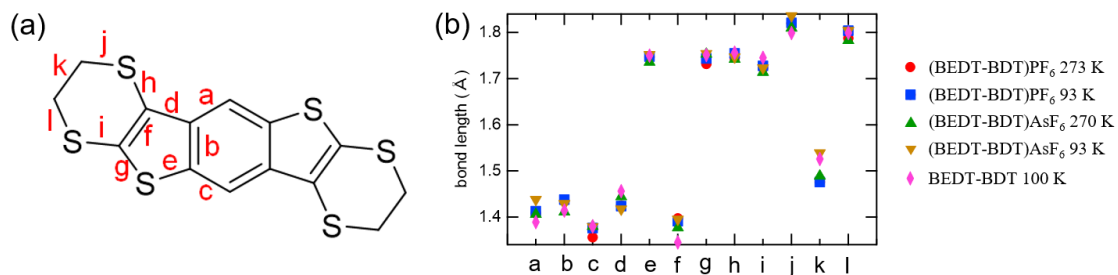

**Figure S1.** (a) Definition of label at each bond of BEDT-BDS molecule. (b) Relationship between bond length and molecular valence.

**Table S2** List of bond lengths of BEDT-BDT and their charge-transfer salts.

|              | (BEDTBDT)PF <sub>6</sub> | (BEDTBDT)PF <sub>6</sub> | (BEDTBDT)AsF <sub>6</sub> | (BEDTBDT)AsF <sub>6</sub> | BEDT-BDT |
|--------------|--------------------------|--------------------------|---------------------------|---------------------------|----------|
| <i>T</i> (K) | 273                      | 93                       | 270                       | 93                        | 100      |
| a (Å)        | 1.408                    | 1.413                    | 1.406                     | 1.438                     | 1.389    |
| b (Å)        | 1.434                    | 1.438                    | 1.411                     | 1.429                     | 1.414    |
| c (Å)        | 1.356                    | 1.376                    | 1.380                     | 1.379                     | 1.38     |
| d (Å)        | 1.425                    | 1.424                    | 1.444                     | 1.417                     | 1.456    |
| e (Å)        | 1.747                    | 1.748                    | 1.736                     | 1.752                     | 1.75     |
| f (Å)        | 1.397                    | 1.391                    | 1.377                     | 1.395                     | 1.345    |
| g (Å)        | 1.732                    | 1.744                    | 1.753                     | 1.754                     | 1.751    |
| h (Å)        | 1.745                    | 1.755                    | 1.742                     | 1.747                     | 1.756    |
| i (Å)        | 1.723                    | 1.728                    | 1.714                     | 1.723                     | 1.745    |
| j (Å)        | 1.820                    | 1.821                    | 1.810                     | 1.836                     | 1.799    |
| k (Å)        | 1.476                    | 1.476                    | 1.489                     | 1.539                     | 1.526    |
| l (Å)        | 1.788                    | 1.804                    | 1.783                     | 1.804                     | 1.799    |

Crystallographic data for (BEDT-BDT)PF<sub>6</sub> at 273 K and BEDT-BDT at 100 K were taken from Refs. 12 and 13, respectively.

### A Definition of the dihedral angle $\theta$

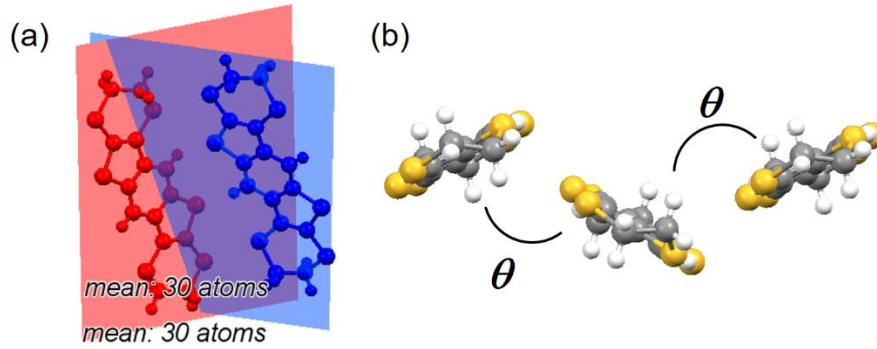

**Figure S2** (a) A plane definition of the BEDT-BDT and (b) a dihedral angle  $\theta$  between the planes formed by two BEDT-BDT molecules on adjacent stacks.

### Magnetic-susceptibility analyses

The Curie constant  $C$  is given by the following equation:

$$C = \frac{NS(S+1)g^2\mu_B^2}{3k_B},$$

where  $N$  is spin density,  $S$  is a spin quantum number ( $S = 1/2$ ),  $g$  is a g-factor ( $g = 2$ ),  $\mu_B$  is a Bohr magneton, and  $k_B$  is a Boltzmann constant. When  $C = 0.14$  emu K/mol is used,  $N$  is determined to be 0.373.

Two model calculations were performed to analyze the magnetic susceptibility at low temperatures below 150 K; calculations were performed using the same 2D triangular lattice as the  $\text{PF}_6$  salt of the previous study<sup>12,S4</sup> and the 1D chain model<sup>18</sup>.

The magnetic Hamiltonians is,

$$\hat{H} = \sum J S_i \cdot S_j.$$

2D triangular lattice model was calculated from the extrapolation method using the [7/7] Padé approximation as follows:

$$\chi = \frac{Ck_B4x(1 + a_1x + \dots + a_6x^6)}{J(1 + b_1x + \dots + b_7x^7)},$$

where,  $x = J/4k_BT$  and  $C = N_A g^2 \mu_B^2 / 4k_B$  ( $N_A$  is an Avogadro constant). The suggested coefficients are as follows:

$$\begin{aligned}
a_1 &= 13.1382922, & a_2 &= 38.2639722, & a_3 &= 214.74454, \\
a_4 &= 260.983171, & a_5 &= 622.734802, & a_6 &= 186.114208, \\
\text{and} \\
b_1 &= 19.1382922, & b_2 &= 129.093725, & b_3 &= 597.98788, \\
b_4 &= 1902.06491, & b_5 &= 3943.84464, & b_6 &= 5164.9974, \\
b_7 &= 3452.67229.
\end{aligned}$$

1D chain model was calculated as follows,

$$\chi = \frac{Ng^2\mu_B^2}{k_B T} \frac{(1 + 0.14995x + 0.30094x^2)}{(1 + 1.9862x + 0.68854x^2 + 6.0626x^3)}.$$

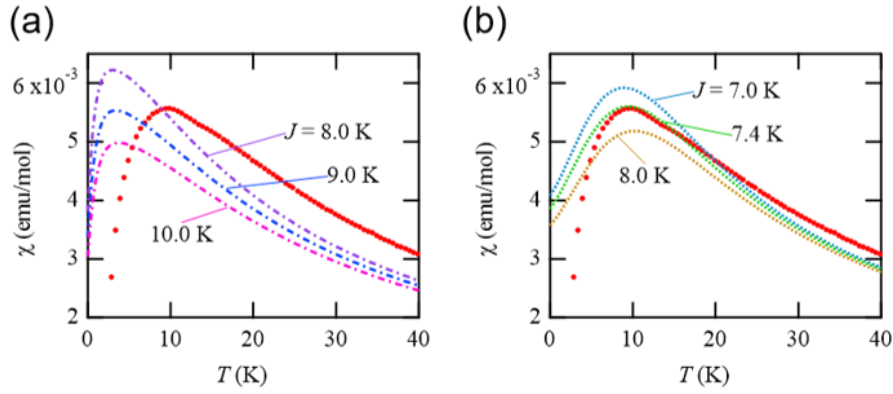

**Figure S3** Exchange coupling  $J$  dependence of the calculation results for (a) 2D triangular lattice and (b) 1D chain model. Red curves are experimental data of the AsF<sub>6</sub> salt.

The calculation results and experimental data are shown in Figure S3. From the comparison of temperature dependence, where the magnetic susceptibility takes the maximum value, the 1D chain model at  $J = 7.4$  K is most suitable to the experimental data.

## References

[S1] M. J. Frisch, G. W. Trucks, H. B. Schlegel, G. E. Scuseria, M. A. Robb, J. R. Cheeseman, G. Scalmani, V. Barone, B. Mennucci, G. A. Petersson, H. Nakatsuji, M. Caricato, X. Li, H. P. Hratchian, A. F. Izmaylov, J. Bloino, G. Zheng, J. L. Sonnenberg, M. Hada, M. Ehara, K. Toyota, R. Fukuda, J. Hasegawa, M. Ishida, T. Nakajima, Y. Honda, O. Kitao, H. Nakai, T. Vreven, J. A. Montgomery, Jr., J. E. Peralta, F. Ogliaro, M. Bearpark, J. J. Heyd, E. Brothers, K. N. Kudin, V. N. Staroverov, R. Kobayashi, J.

Normand, K. Raghavachari, A. Rendell, J. C. Burant, S. S. Iyengar, J. Tomasi, M. Cossi, N. Rega, J. M. Millam, M. Klene, J. E. Knox, J. B. Cross, V. Bakken, C. Adamo, J. Jaramillo, R. Gomperts, R. E. Stratmann, O. Yazyev, A. J. Austin, R. Cammi, C. Pomelli, J.W. Ochterski, R. L.Martin, K.Morokuma, V. G. Zakrzewski, G. A. Voth, P. Salvador, J. J. Dannenberg, S. Dapprich, A. D. Daniels, Ö. Farkas, J. B. Foresman, J. V. Ortiz, J. Cioslowski and D. J. Fox, Gaussian 09, Gaussian, Inc., Wallingford, CT, 2009.

[S2] D. Becke, *J. Chem. Phys.*, 1993, **98**, 5648-5652.

[S3] P. C. Hariharan and J. A. Pople, *Theor. Chim. Acta*, 1973, **28**, 213-222.

[S4] M. Tamura and R. Kato, *J. Phys. Cond. Matt.*, 2002, **14**, L729.
